# Supplementary material
Source: ML conference proceedings conference paper supplement (https://openreview.net/forum?id=BywV1Cris4)

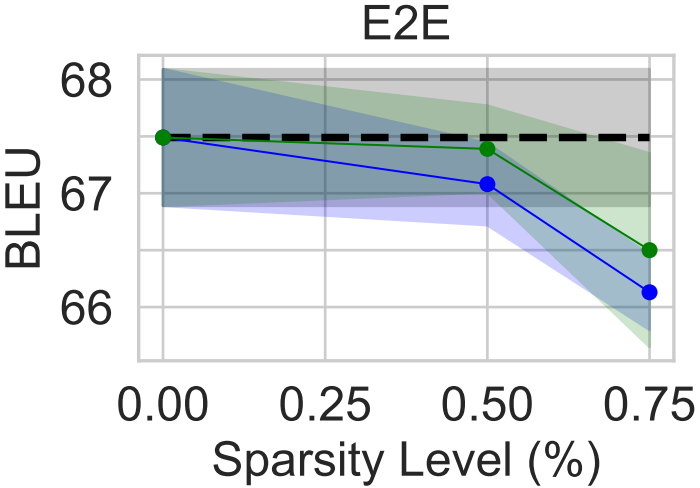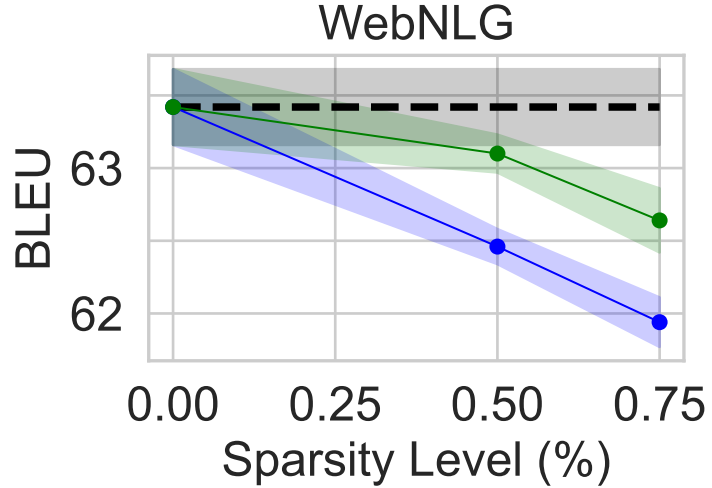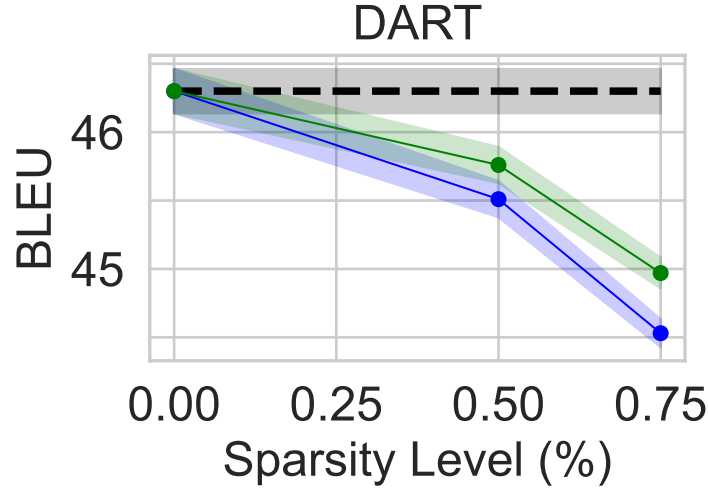

--- Dense (baseline)

—●— Sparse Fine-tune

—●— Dense Fine-tune

Supplement: supplementary_material [file attachment]

GPT-3 XL Pre-trained vs. DART Weights - Sparsity (0%)

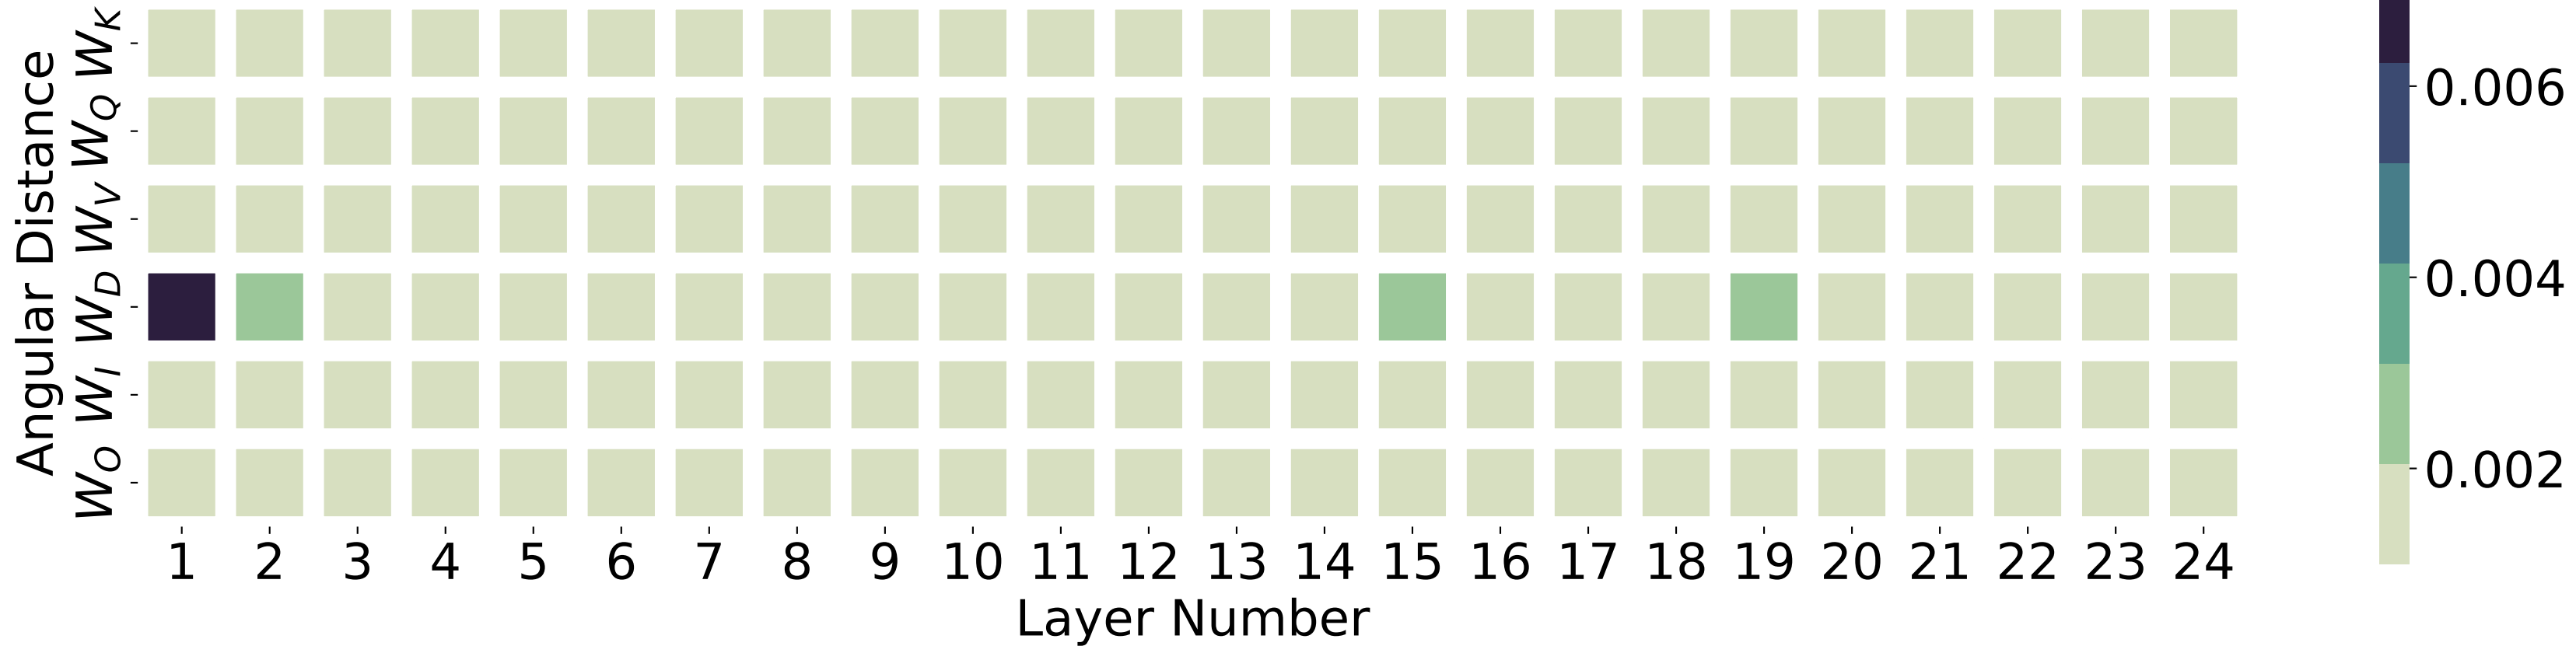

Supplement: supplementary_material [file attachment]

## GPT-2 Small Pre-trained vs. WebNLG Weights - Sparsity ( 50%) Weight Type (all)

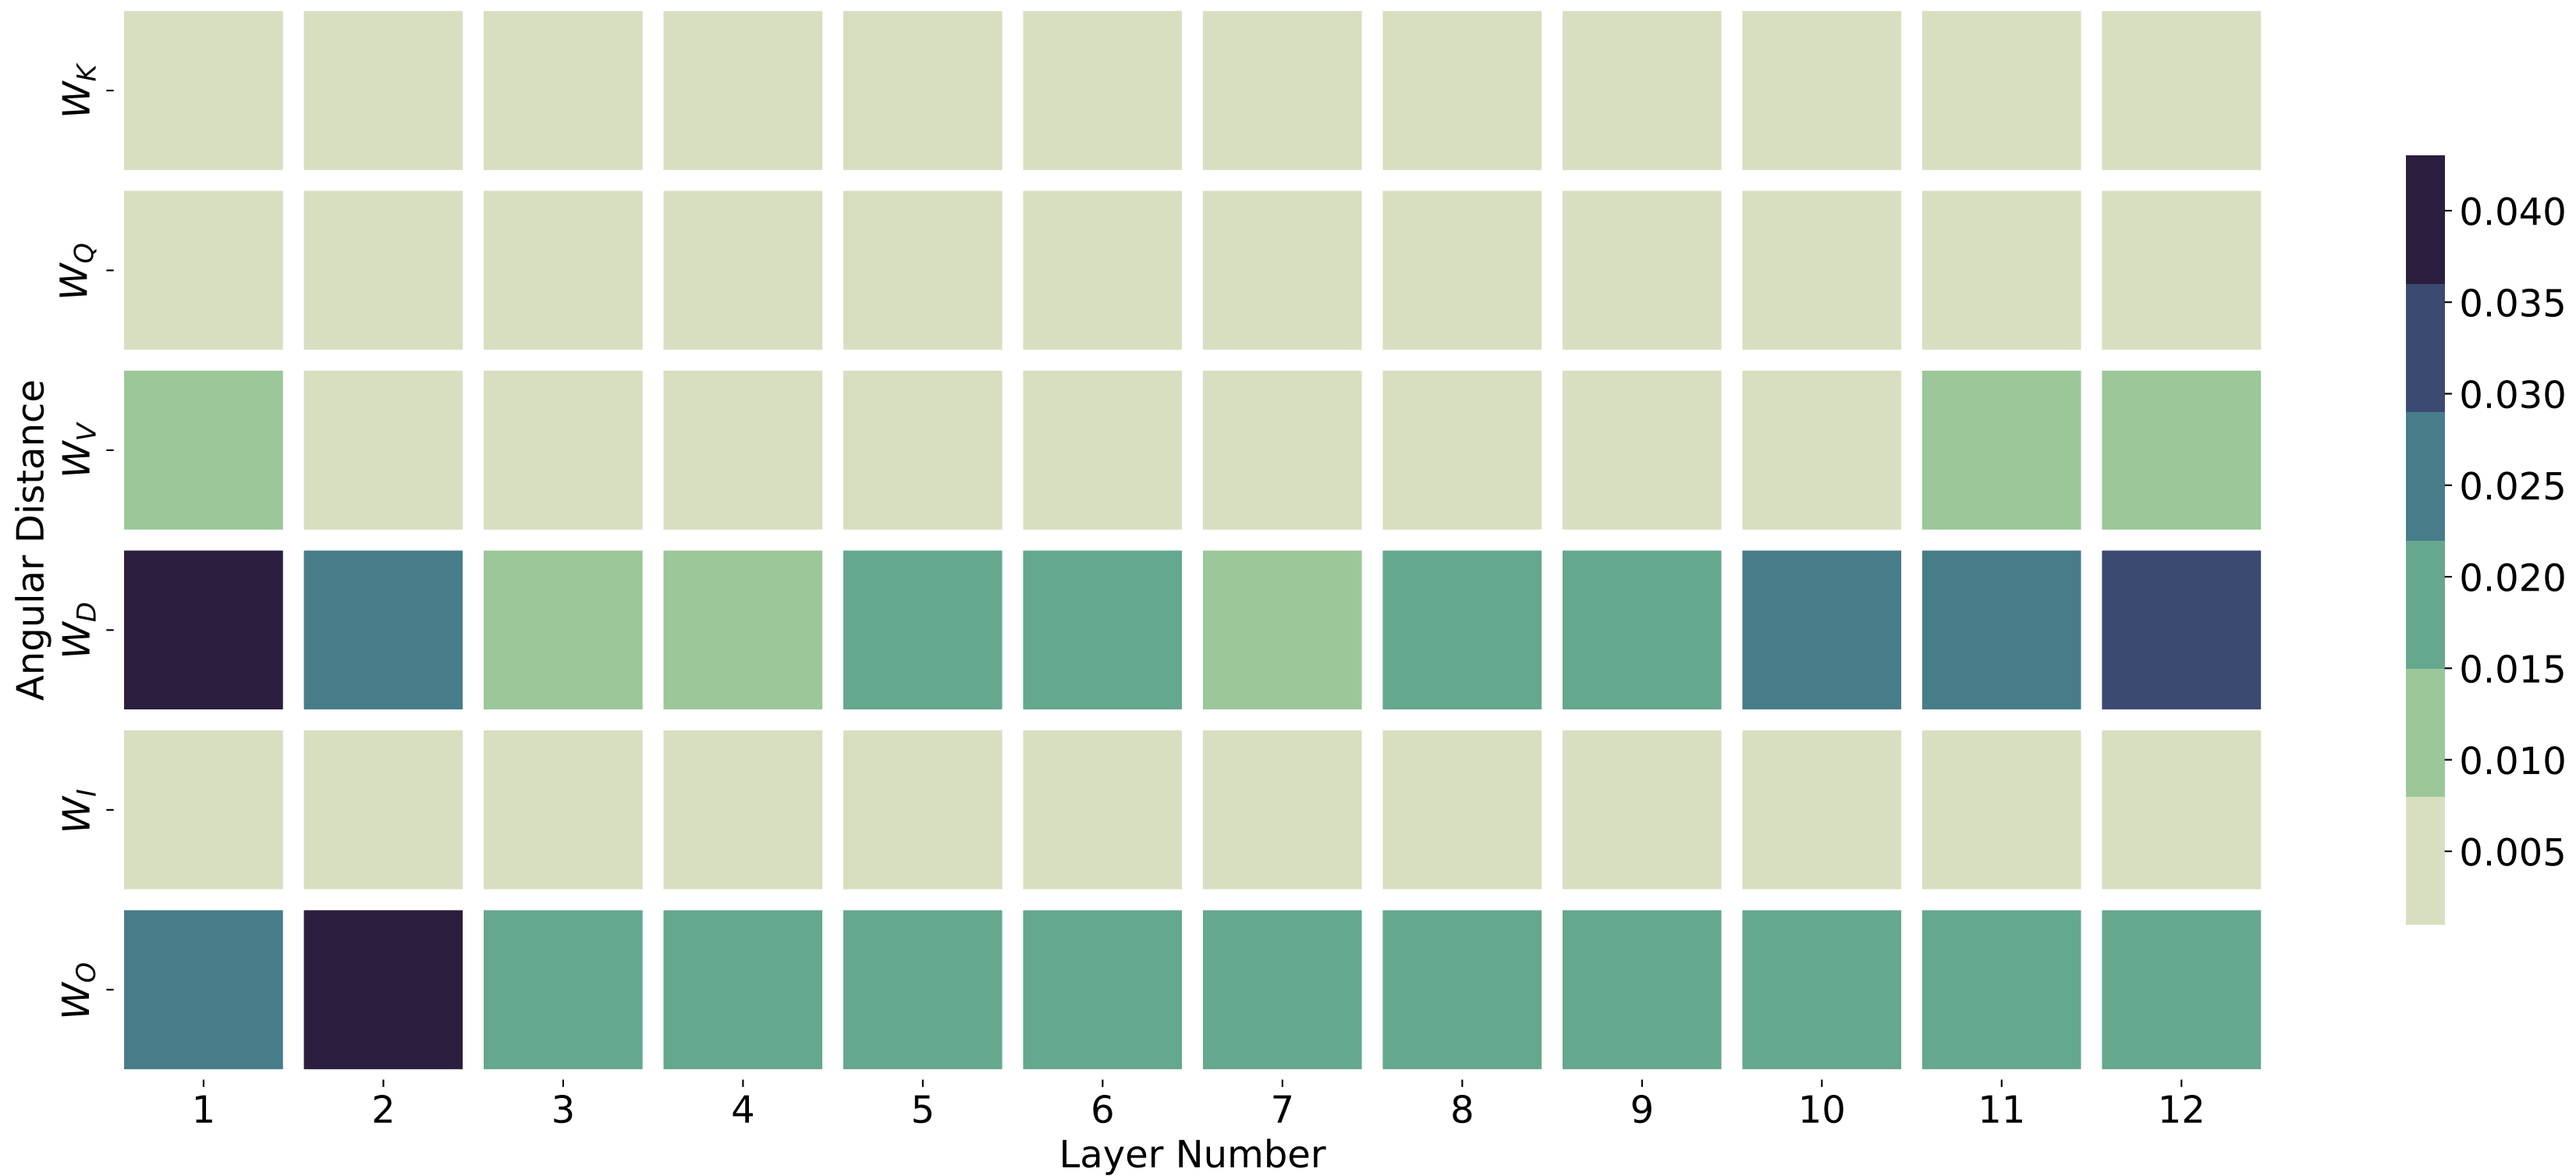

Supplement: supplementary_material [file attachment]

# GPT-2 Small Pre-trained vs. DART Weights - Sparsity (0%)

Angular Distance

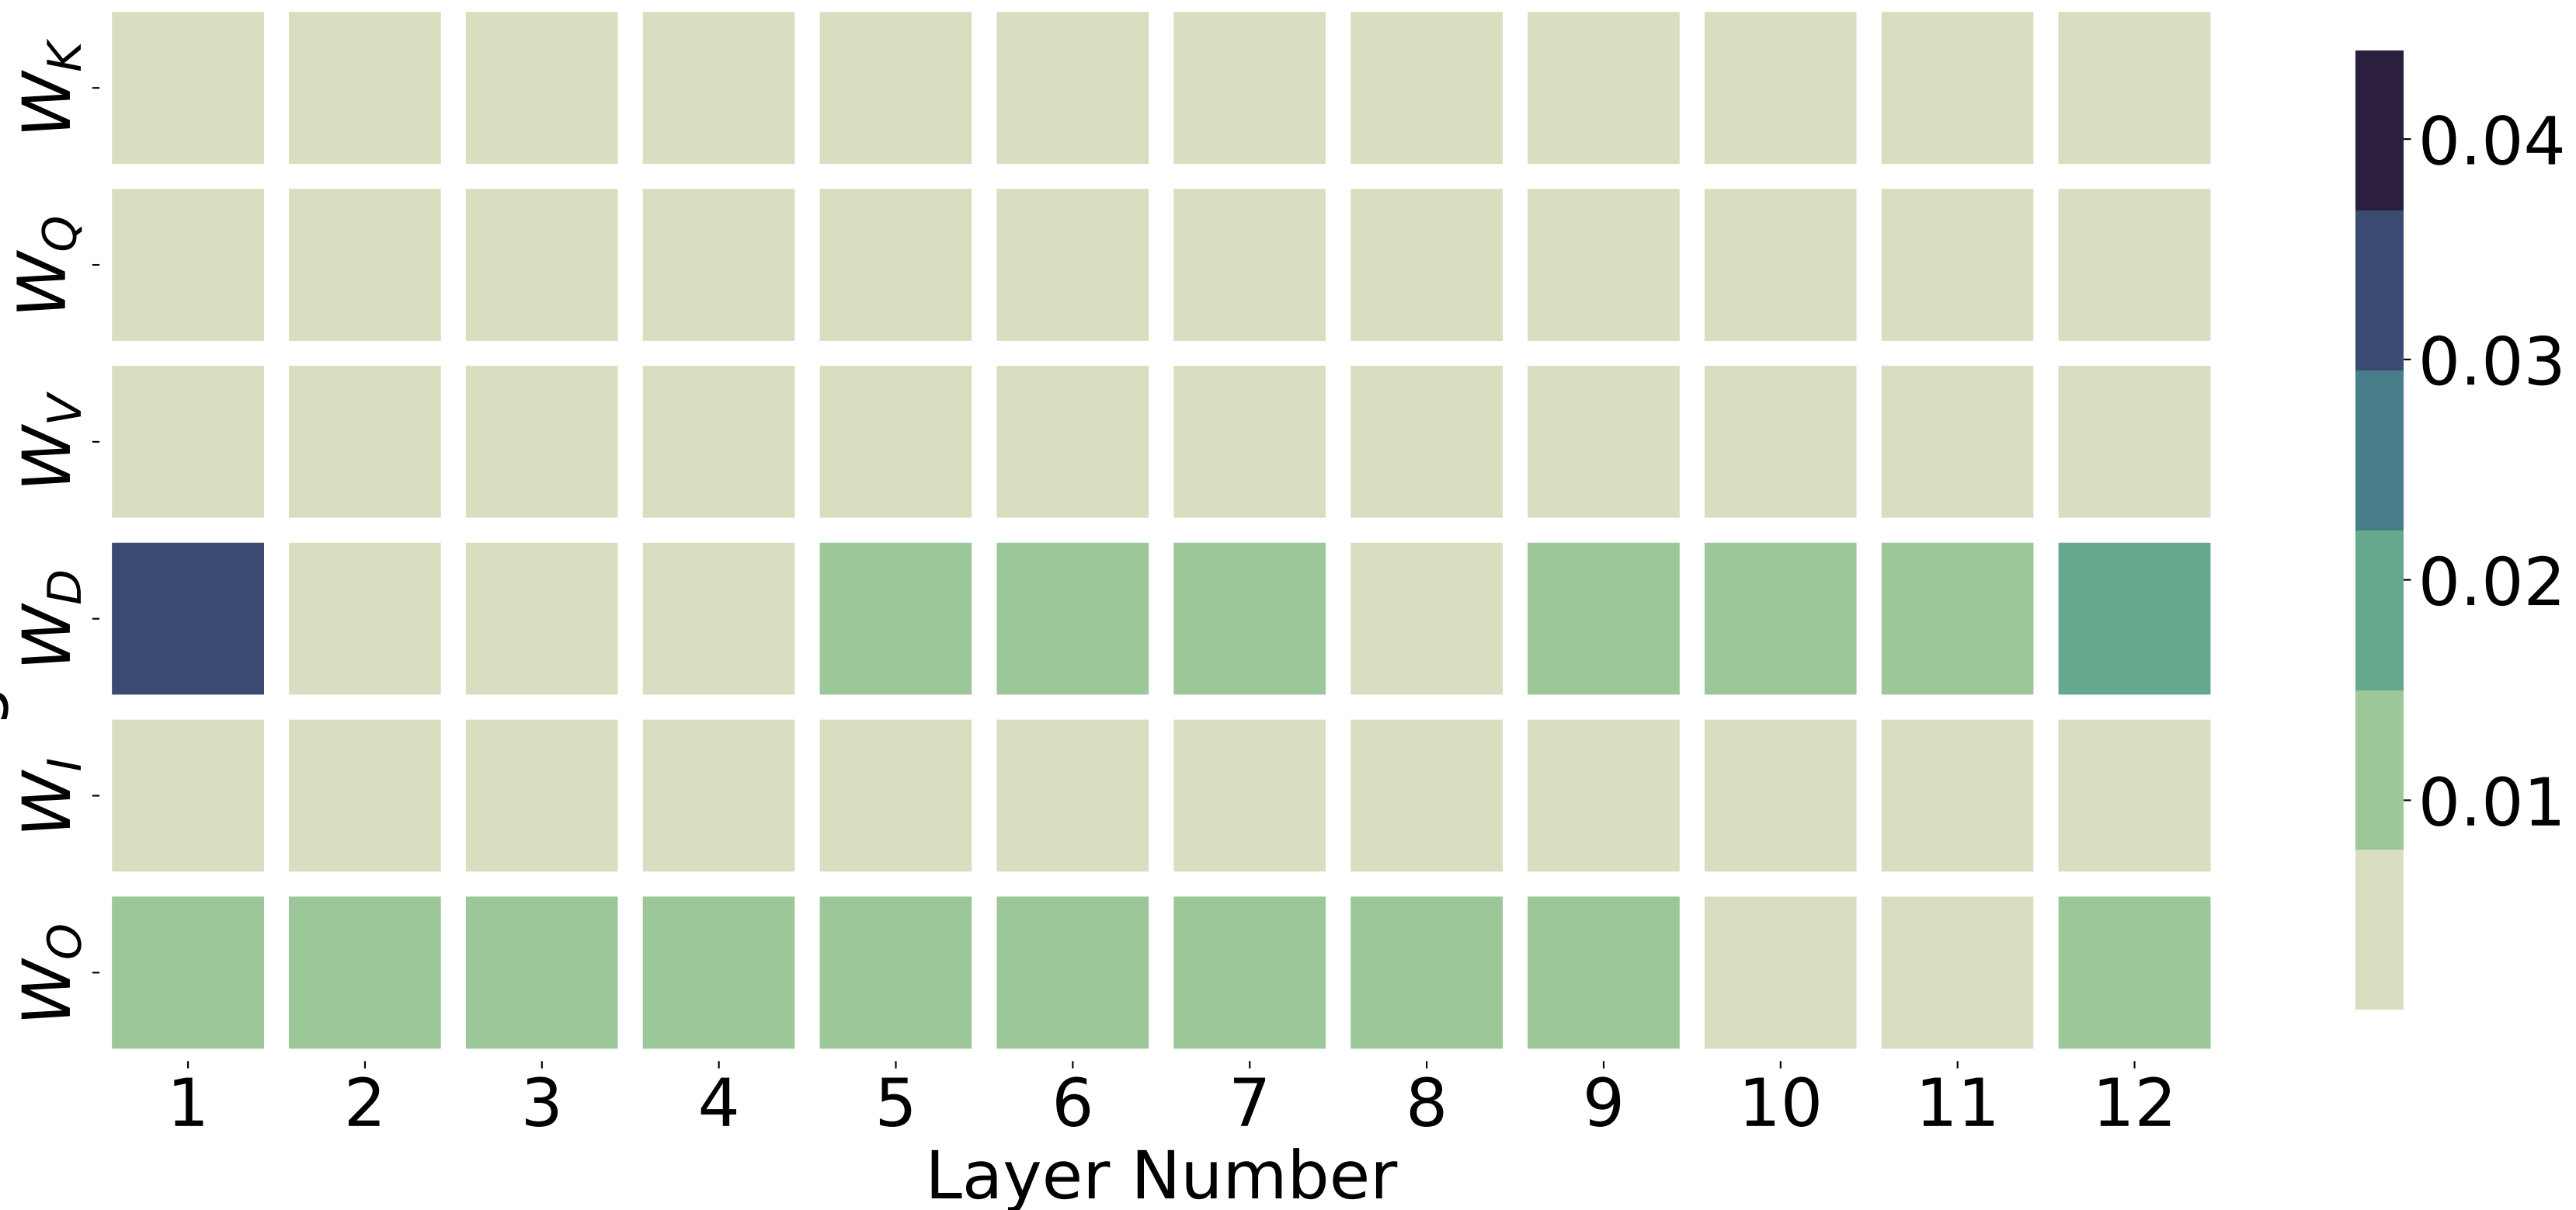

Supplement: supplementary_material [file attachment]

GPT-2 Small Pre-trained vs. WebNLG Weights - Sparsity ( 75%) Weight Type (all)

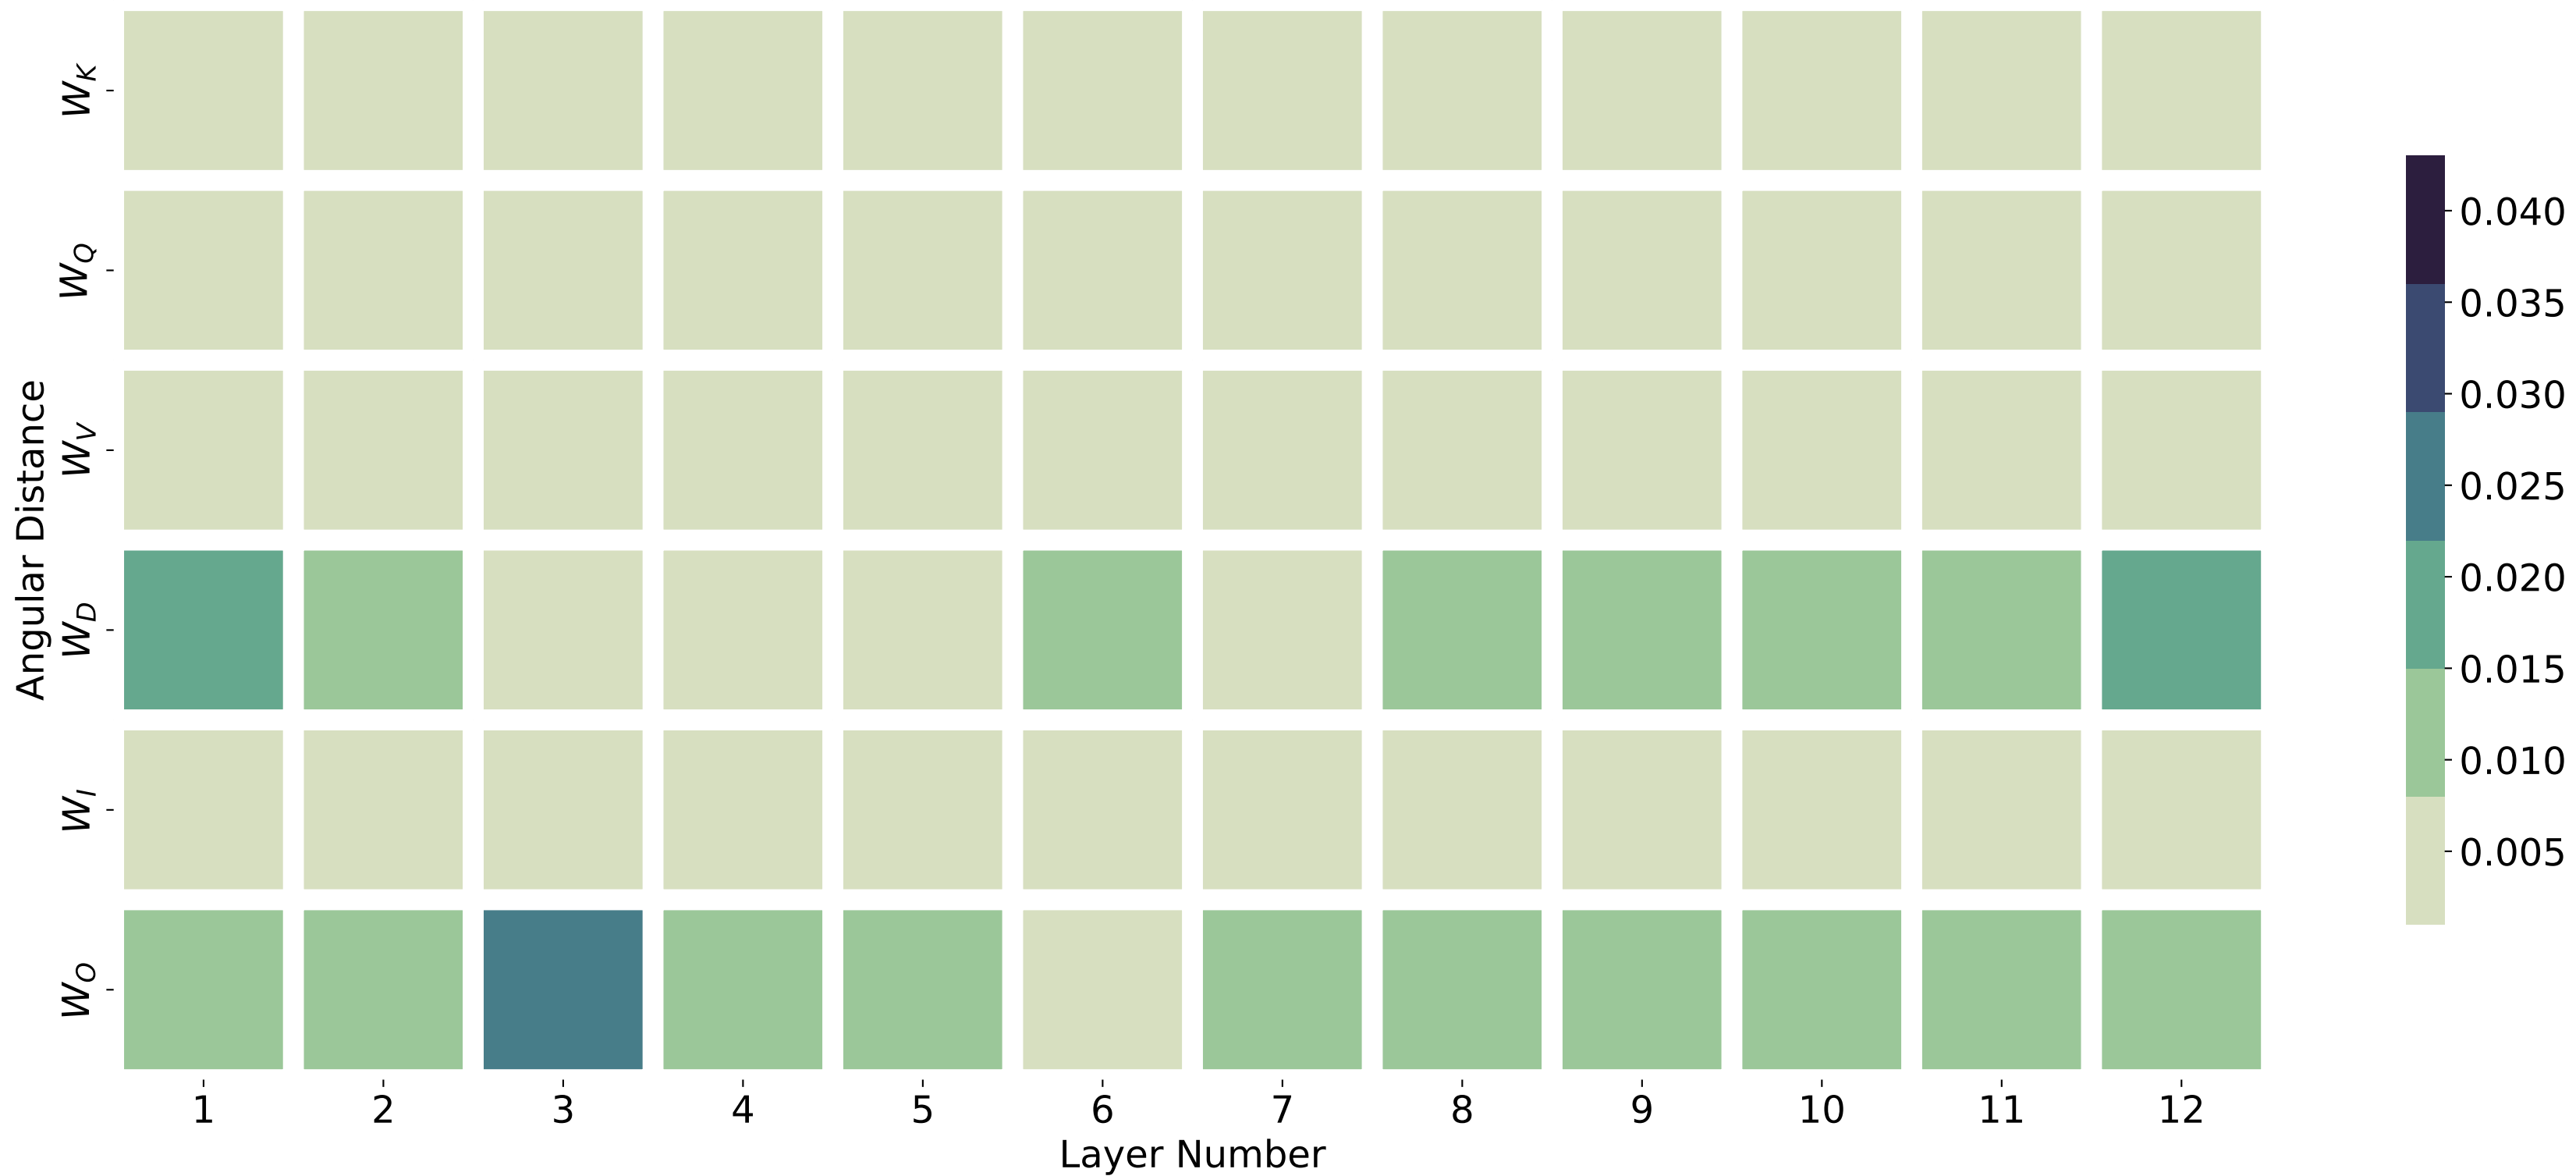

Supplement: supplementary_material [file attachment]

GPT-2 Small Pre-trained vs. WebNLG Weights- Sparsity ( 0%) Weight Type (all)

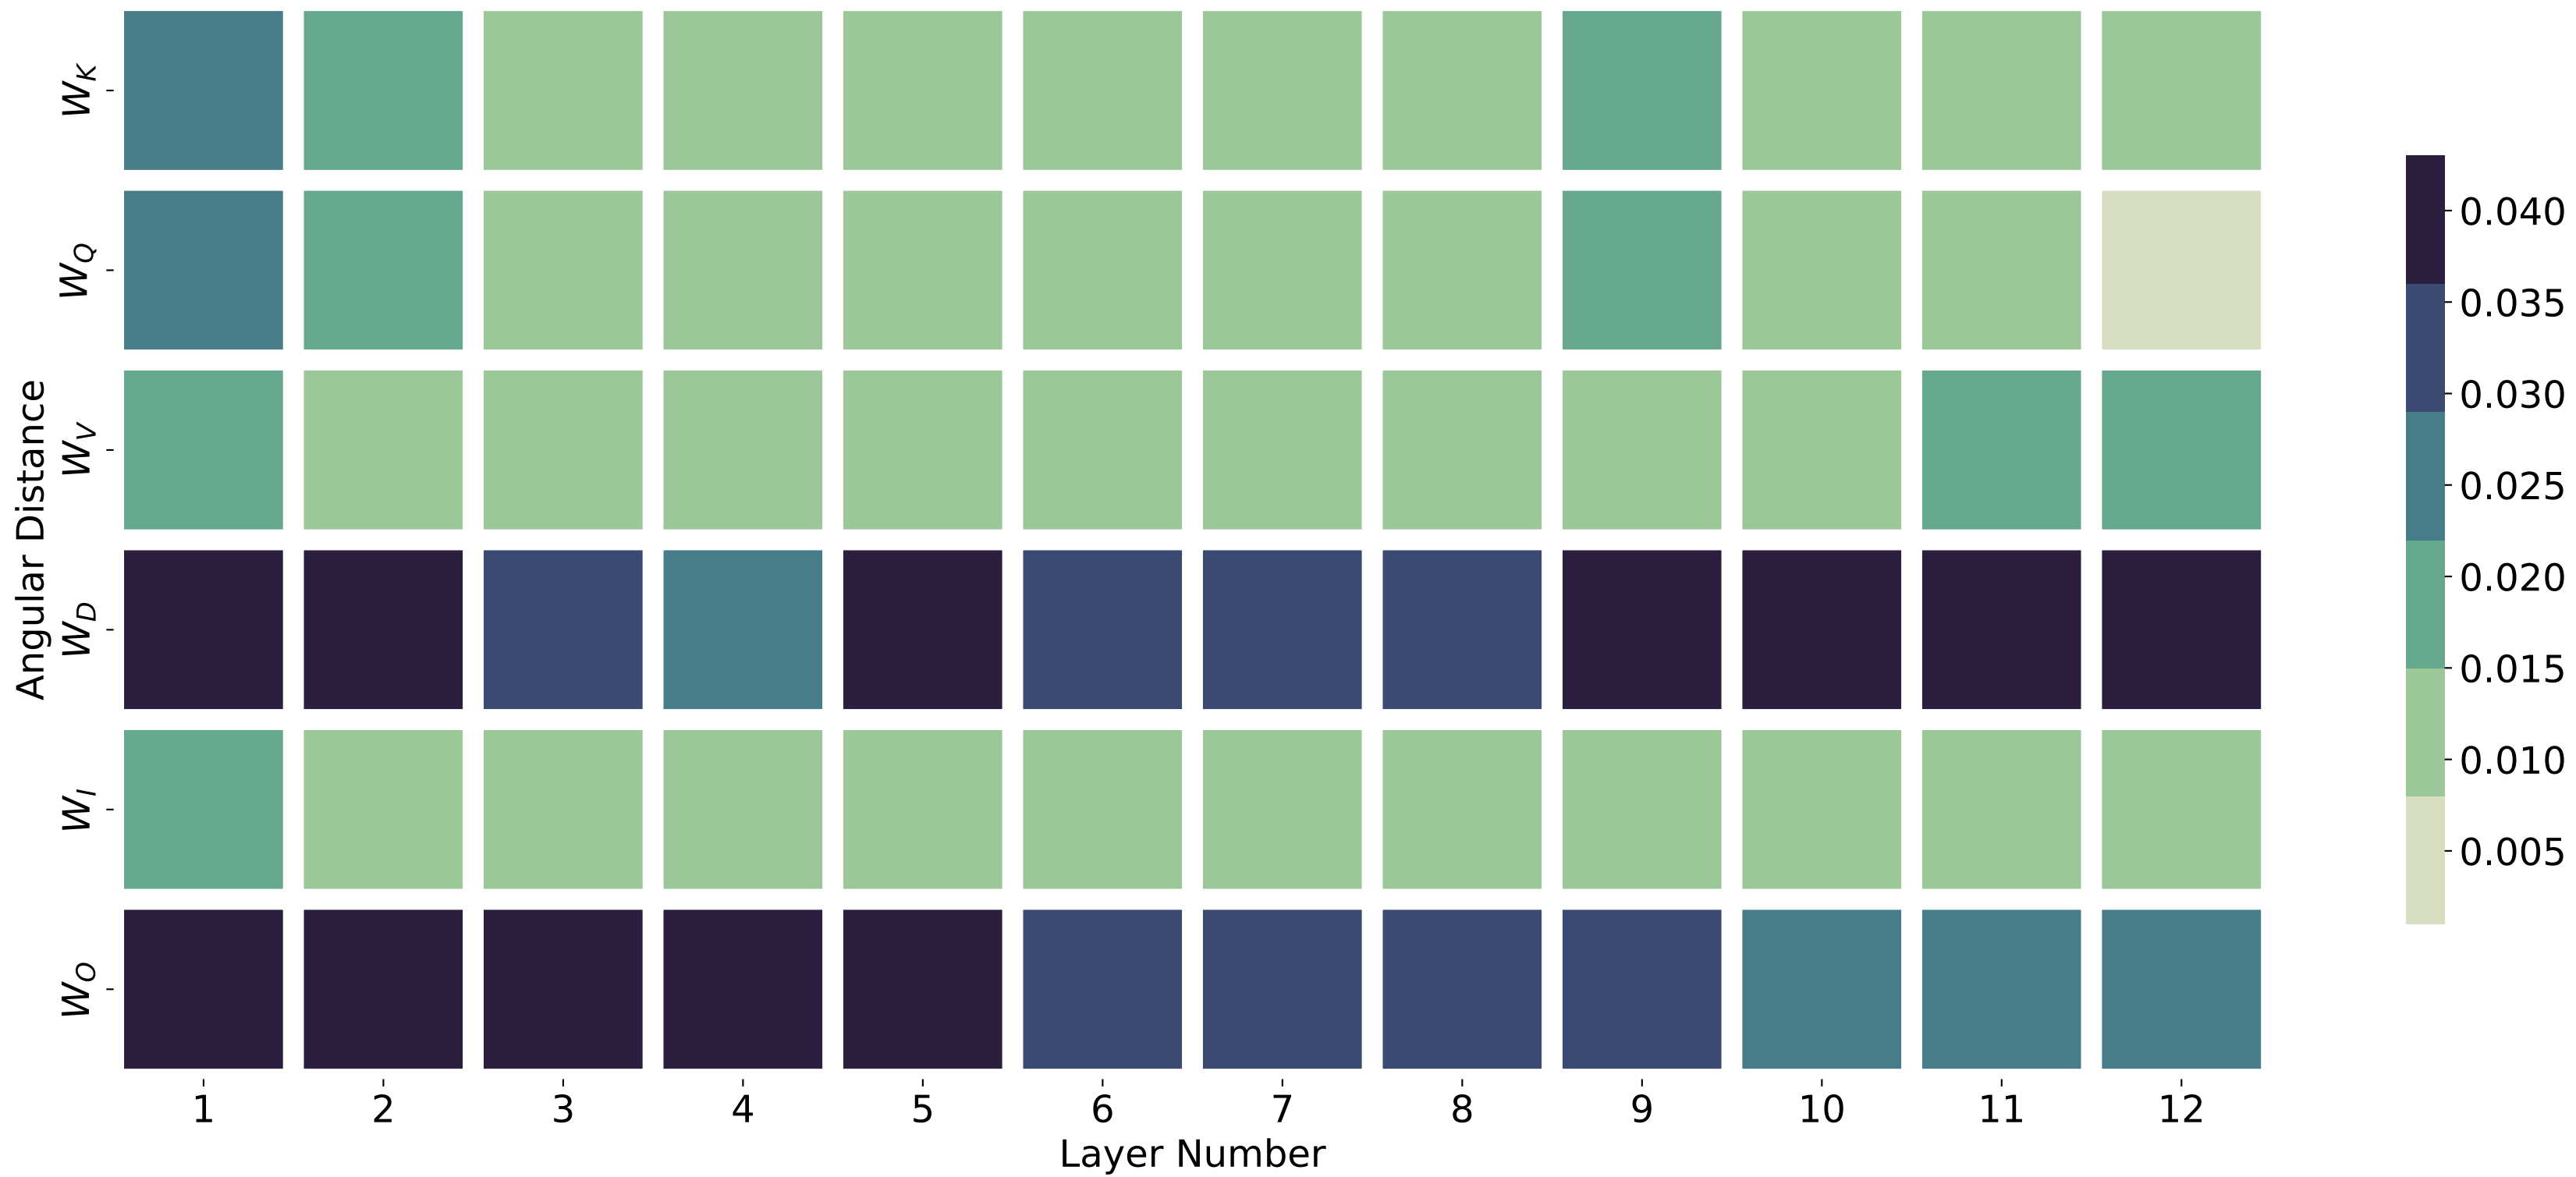

Supplement: supplementary_material [file attachment]

GPT-3 XL Pre-trained vs. WebNLG Weights - Sparsity ( 50%) Weight Type (all)

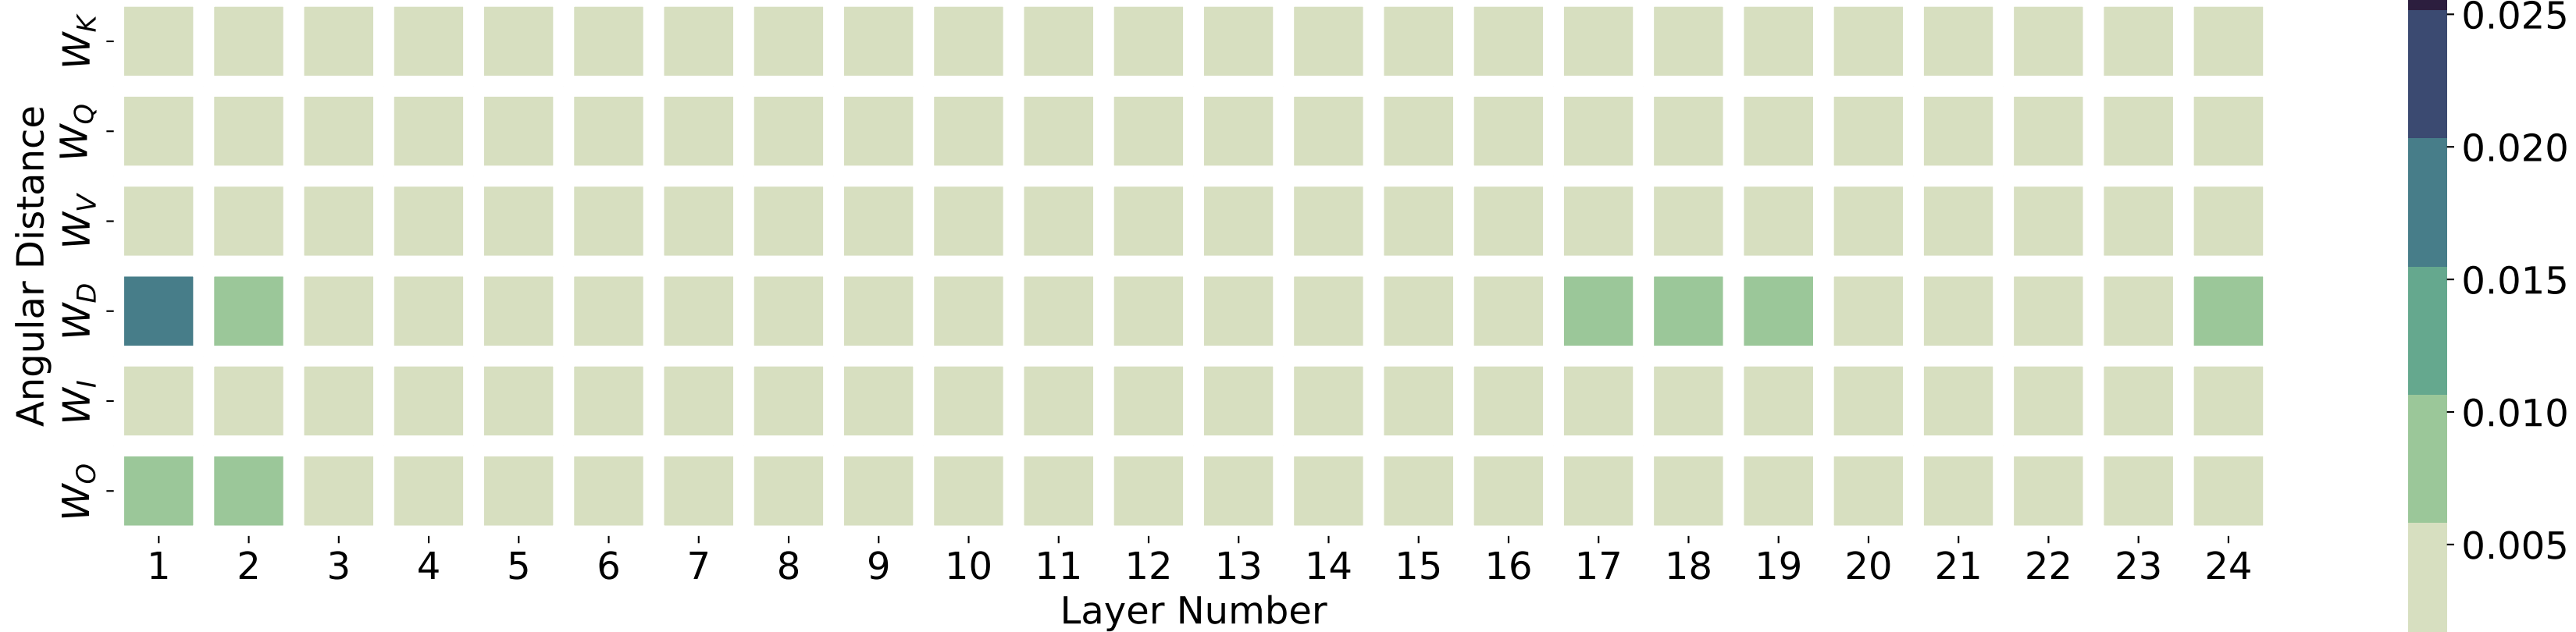

Supplement: supplementary_material [file attachment]

Dense Network

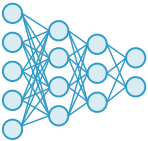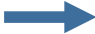

Sparse Pre-training

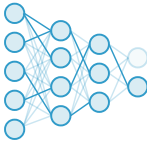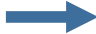

Dense Fine-tuning

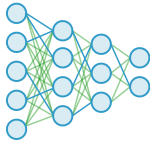

Supplement: supplementary_material [file attachment]

GPT-3 XL Pre-trained vs. DART Weights - Sparsity (75%)

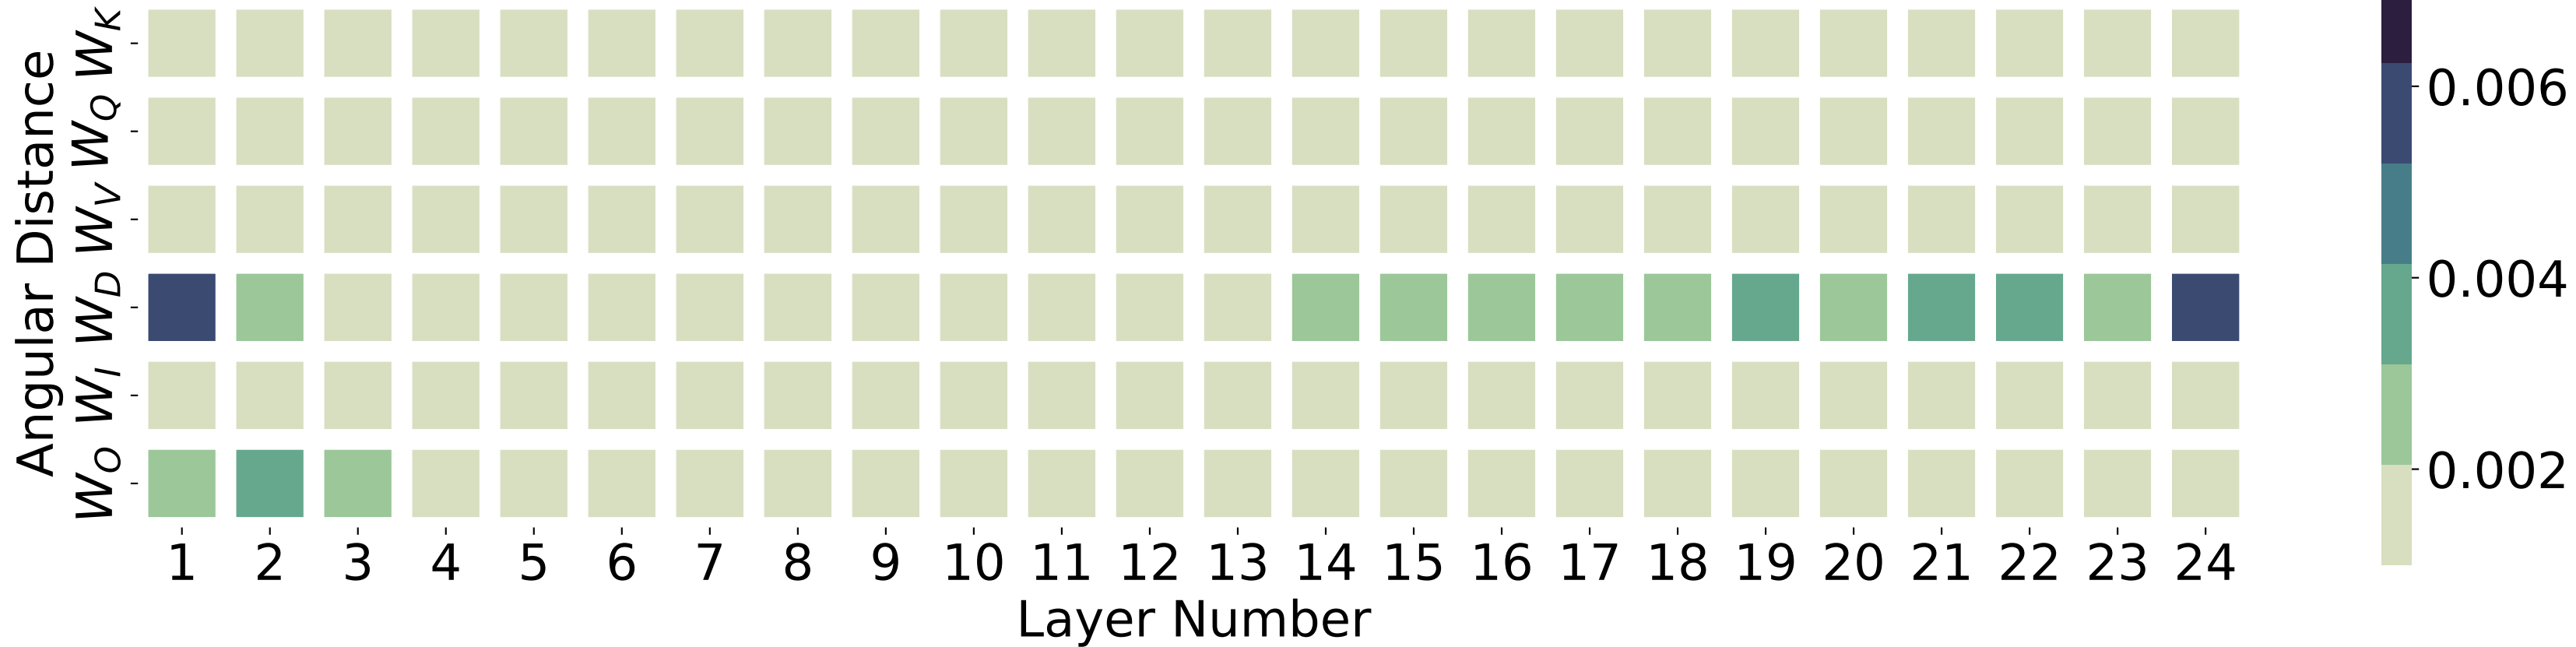

Supplement: supplementary_material [file attachment]

MatMul Speedup vs. Sparsity Level  
on GPT-3 Layer (12k\*12k MatMul)

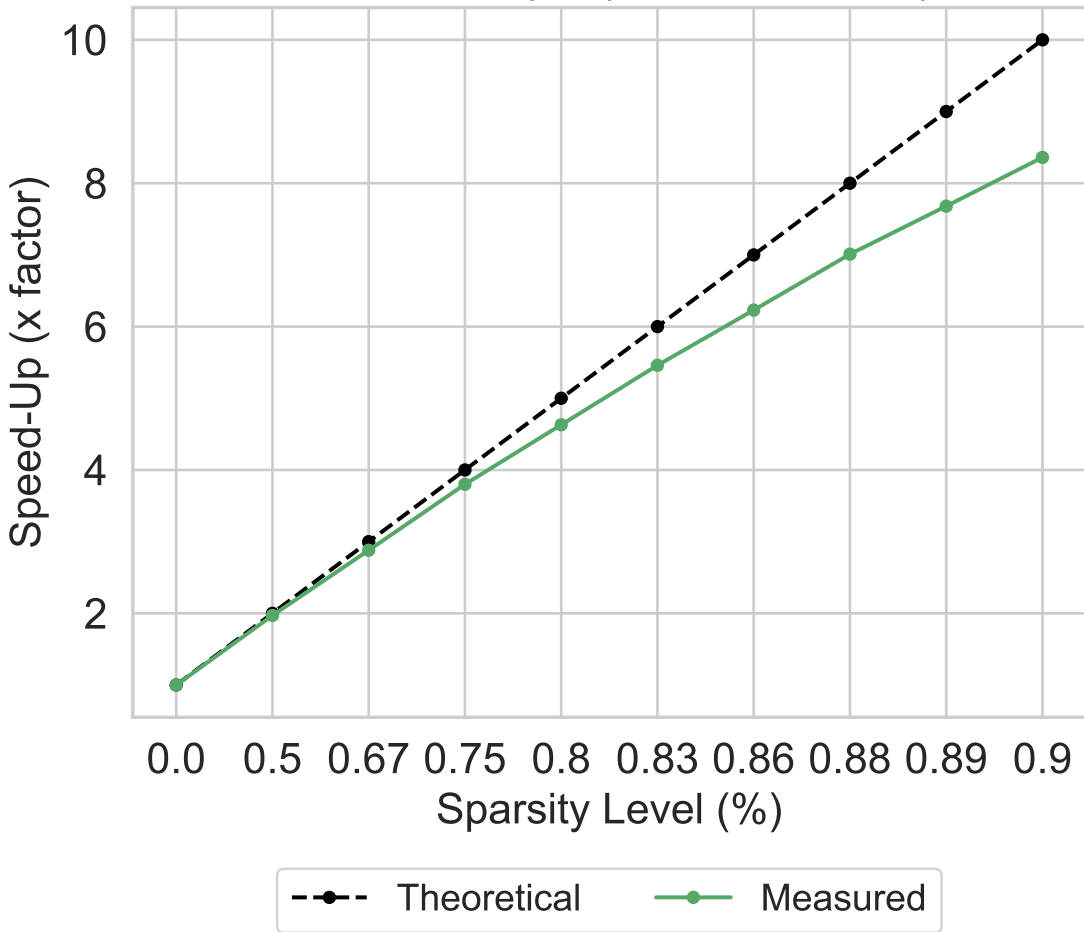

Supplement: supplementary_material [file attachment]
